# Supplementary material for: BAG3 regulates bone marrow mesenchymal stem cell proliferation by targeting INTS7
Source: PeerJ journal article supplement (doi:10.7717/peerj.15828), 2023-08-09
Supplement: The_raw_data_of_statistical_analysis.zip [file The_raw_data_of_statistical_analysis.zip]

## Sheet: Sheet1
Repeat 1								Repeat 2
ints7	1118	864	641	786	243	201		ints7	1092	912	657	801	255	199
tubulin	863	994	1079	938	940	802		tubulin	877	1001	1089	945	944	851
	1.29548	0.869215	0.594069	0.837953	0.258511	0.250623			1.24515	0.911089	0.603306	0.847619	0.270127	0.233843
	1	0.67096	0.45857	1	0.308503	0.29909			1	0.731708	0.484523	1	0.318689	0.275882
Repeat 1
ints7	1211	889	698	799	278	209
tubulin	899	987	1011	996	911	854
	1.34705	0.900709	0.690406	0.802209	0.305159	0.244731
	1	0.668652	0.512531	1	0.380399	0.305071
